# Supplementary material for: A Screen for Key Genes and Pathways Involved in High-Quality Brush Hair in the Yangtze River Delta White Goat
Source: PubMed Central journal article supplement (PMC5268778; doi:10.1371/journal.pone.0169820), 2017-01-26
Supplement: pone.0169820.s001.pdf [file pone.0169820.s001.pdf]

| Gene name                                           | Gene ID   | Chromosome_ID | Length | High-Quality RPKM | Non High-Quality RPKM | log2Fold Change |
|-----------------------------------------------------|-----------|---------------|--------|-------------------|-----------------------|-----------------|
| warm-temperature-acclimation-related 65-kDa protein | 100049497 | chr 2         | 1,392  | 5.9871            | 0.0358                | 6.89            |

Gene sequence:

CTAATAAGCAGATTCTCCCTTCTCTGACTCCTAATCCTGACATCCCATCATTG  
CTGAGGTGATGGGCTCAAACAAAGCTATGTGTCTGCCCCGAGCCAGAATCA  
GCACGGTGT CATAGTGGTAAAAATGTGAACCTTTAAACACTTTAATTCCCC  
TGGACCACACAGAGCAGCATCAGGGCCGTGCAAGTATGCAGGCATAGGCA  
GATCTCGGGTCACGATCCTGGGCGTGGTGGTTAGGTCGACGCCATACAGCC  
TTGATCCTTTGAATATGTGAACAATGTGTTACCCGGACAGAGAAAAGCAG  
CGTCCACATGTCCTTCAAAGTTGAGCTCTTCCTTCAGGGTTTTAGGGTAGC  
CTTCGATCAGCGTGTAGGGAGCAGCTGCTTTATAGATGTAAACCTGATCATC  
CTTAATCAAGTAGATTTTGTGTCAGTGTAGGAGAAGGCAGCATCCACCCCACC  
AGTCACCTCCTTCCACGCCCTCGTGATTGGGAAGGCGTGGAGGCCGTCAC  
GCCGGGTGTCCAGACGCATGTACATACGGCCTGCAAATAAATAGGTTTTGC  
CTACATCATCAGTGGTGTGATGGCATCTATTTGAGCTCACTGCATTTAGGGAT  
GCTATAATGACCTCCATGGCCAAAGTTGGGGCACGACATAAAGTAATGACG  
GGCGTCCTTCGGGTAGGTCCTTCACCTCTCCCGATACAGGGTTGAACCT  
GGTGAAGTTGTGTCCGTGGAAACAGTAGTAGTGCTCCTGCCAGCGTAGAG  
CGGCAGTGCAGACAGGCAGGTGGGGCCATGTCTTGATCTTCACTGTCTTCG  
TTGCAATATCATAAACATGCACATCATGTCCCTTGAAGAACAGAACCGAGT  
CAGTCGTGCACTCTCCTTTGGGACACTCCACAGCAGCATCAAGGTGAGCA  
GGGACTCCTGGGAAGTCTTCCTGGATTCTTTTGGATAGCCGTCCTCTAGA  
GTATGGTTATAGTAGCTGAACACCTTGTGTCATCCAGGAAGAAATAGATGTGAT  
CGTGGTTCGTCTGGGTTCTCTGCGTCGTGCATACGGAAGGCGGGCGTCAACGT  
GGCCTATGTTGTGGTTCGTCATCCAGCTCCTTGAAGAACTCGTTGGAGAGGT  
GAGCTGCACCACTGAAACCCTTCCATAGGTGGCTACCTTTGAAGAAGAAA  
GTTGTTCTTTCTCGTCAGGAGCGATTGCATCAAATTCATCCAGCACACC  
TGTCTGGCAGAGCTCCTACTGCTGCATCTTCTGGGTGCGCCGGGGCGCCGT  
TAGTGAGGCCAAAAGCCAAGCACAGAAAGAGTGATCTGGTGAGCAGCTTC  
ATGACGTCCAGTCCTGATGGAGACCTTGAATGTGGCTGTAGTCTAAAAGTA  
GTGTCACAAGGTAA

The results of the blast by NCBI.

**Sequences producing significant alignments:**  
 Select: [All](#) [None](#) Selected: 0  
[Alignments](#) [Download](#) [GenBank](#) [Graphics](#) [Distance tree of results](#)

|                          | Description                                                                                                               | Max score | Total score | Query cover | E value | Ident | Accession                      |
|--------------------------|---------------------------------------------------------------------------------------------------------------------------|-----------|-------------|-------------|---------|-------|--------------------------------|
| <input type="checkbox"/> | <a href="#">Scomberomorus niphonius warm temperature acclimation related 65kDa protein 2 (Wap65-2) mRNA, complete cds</a> | 1365      | 1365        | 97%         | 0.0     | 85%   | <a href="#">KT356863.1</a>     |
| <input type="checkbox"/> | <a href="#">TPA: Dicentrarchus labrax warm temperature acclimation protein 65-2 mRNA, complete cds</a>                    | 1112      | 1112        | 93%         | 0.0     | 82%   | <a href="#">BK006868.1</a>     |
| <input type="checkbox"/> | <a href="#">Oplegnathus fasciatus warm-temperature-acclimation-related 65-kDa protein (Wap65-2) mRNA, complete cds</a>    | 1072      | 1072        | 96%         | 0.0     | 81%   | <a href="#">JQ268276.1</a>     |
| <input type="checkbox"/> | <a href="#">Lateolabrax japonicus mRNA for warm temperature acclimation protein 65-2 (wap65-2 gene)</a>                   | 1024      | 1078        | 83%         | 0.0     | 83%   | <a href="#">FR828805.1</a>     |
| <input type="checkbox"/> | <a href="#">PREDICTED: Notothenia coriiceps hemopexin (hpx), mRNA</a>                                                     | 1003      | 1003        | 81%         | 0.0     | 83%   | <a href="#">XM_010790038.1</a> |
| <input type="checkbox"/> | <a href="#">PREDICTED: Lates calcarifer hemopexin (hpx), transcript variant X2, mRNA</a>                                  | 979       | 979         | 81%         | 0.0     | 82%   | <a href="#">XM_018701742.1</a> |
| <input type="checkbox"/> | <a href="#">PREDICTED: Lates calcarifer hemopexin (hpx), transcript variant X1, mRNA</a>                                  | 979       | 979         | 81%         | 0.0     | 82%   | <a href="#">XM_018701741.1</a> |
| <input type="checkbox"/> | <a href="#">Harpagifer antarcticus mRNA for warm temperature acclimation related-like 65kDa protein (wap65-2 gene)</a>    | 977       | 977         | 81%         | 0.0     | 82%   | <a href="#">AM408054.1</a>     |
| <input type="checkbox"/> | <a href="#">Miichthys miiuy mRNA for warm temperature acclimation protein 65 KDa-2 (wap65-2 gene)</a>                     | 913       | 913         | 74%         | 0.0     | 83%   | <a href="#">FN811135.1</a>     |
| <input type="checkbox"/> | <a href="#">PREDICTED: Lates calcarifer hemopexin (hpx), transcript variant X3, mRNA</a>                                  | 905       | 905         | 75%         | 0.0     | 82%   | <a href="#">XM_018701743.1</a> |
| <input type="checkbox"/> | <a href="#">Larimichthys crocea Wap65-2 precursor, mRNA, complete cds</a>                                                 | 896       | 896         | 80%         | 0.0     | 81%   | <a href="#">KJ412463.1</a>     |
| <input type="checkbox"/> | <a href="#">PREDICTED: Larimichthys crocea hemopexin-like (LOC104936899), mRNA</a>                                        | 885       | 885         | 80%         | 0.0     | 81%   | <a href="#">XM_010752995.1</a> |
| <input type="checkbox"/> | <a href="#">PREDICTED: Larimichthys crocea hemopexin-like (LOC104936904), mRNA</a>                                        | 880       | 880         | 80%         | 0.0     | 81%   | <a href="#">XM_010753000.1</a> |
| <input type="checkbox"/> | <a href="#">Paralichthys olivaceus Wap65-2 mRNA, complete cds</a>                                                         | 798       | 798         | 75%         | 0.0     | 81%   | <a href="#">KC521545.1</a>     |
| <input type="checkbox"/> | <a href="#">PREDICTED: Stegastes partitus hemopexin-like (LOC103370039), mRNA</a>                                         | 785       | 785         | 87%         | 0.0     | 78%   | <a href="#">XM_008298941.1</a> |
| <input type="checkbox"/> | <a href="#">PREDICTED: Haplochromis burtoni hemopexin-like (LOC102307725), mRNA</a>                                       | 741       | 741         | 82%         | 0.0     | 79%   | <a href="#">XM_005945146.2</a> |

## **Scomberomorus niphonius warm temperature acclimation related 65kDa protein 2 (Wap65-2) mRNA, complete cds**

GenBank: KT356863.1

[FASTA](#) [Graphics](#)

---

Go to:

LOCUS KT356863 1725 bp mRNA linear VRT 01-MAY-2016  
DEFINITION Scomberomorus niphonius warm temperature acclimation related 65kDa protein 2 (Wap65-2) mRNA, complete cds.  
ACCESSION KT356863  
VERSION KT356863.1  
KEYWORDS .  
SOURCE Scomberomorus niphonius (Japanese Spanish mackerel)  
ORGANISM [Scomberomorus niphonius](#)  
Eukaryota; Metazoa; Chordata; Craniata; Vertebrata; Euteleostomi; Actinopterygii; Neopterygii; Teleostei; Neoteleostei; Acanthomorphata; Pelagiaria; Scombriformes; Scombridae; Scomberomorus.  
REFERENCE 1 (bases 1 to 1725)  
AUTHORS Liu, J.  
TITLE Molecular cloning of Wap65-2 gene from Scomberomorus niphonius  
JOURNAL Unpublished  
REFERENCE 2 (bases 1 to 1725)  
AUTHORS Liu, J.  
TITLE Direct Submission  
JOURNAL Submitted (30-JUL-2015) College of Life Sciences, China Jiliang University, Xueyuan Street 258, Hangzhou, Zhejiang 0571, P.R. China
